# Supplementary material for: Who Are the High-Cost Users? A Method for Person-Centred Attribution of Health Care Spending
Source: PLOS journal article supplement (doi:10.1371/journal.pone.0149179), 2016-03-03
Supplement: S2 (10.1371/journal.pone.0149179.s002) [file journal.pone.0149179.s002]

**S2 Figure. Ten most prevalent conditions in each of the 12 defined person-centred categories**

| Categories                                                         | Codes                                                             | Description of code                                                                                                                                                             | Number (%) within the category |
|--------------------------------------------------------------------|-------------------------------------------------------------------|---------------------------------------------------------------------------------------------------------------------------------------------------------------------------------|--------------------------------|
| <i>Pregnancy</i>                                                   | <b>ICD-10</b>                                                     | <b><i>Data is captured from the Canadian Institute for Health Information-Discharge Abstract Database (CIHI-DAD). These codes reflect the Most Responsible Diagnosis.</i></b>   |                                |
|                                                                    | O68                                                               | Labour and delivery complicated by fetal stress [distress]                                                                                                                      | 1,921 (10.6)                   |
|                                                                    | O34                                                               | Maternal care for known or suspected abnormality of pelvic organs                                                                                                               | 1,584 (8.8)                    |
|                                                                    | O62                                                               | Abnormalities of forces of labour                                                                                                                                               | 1,139 (6.3)                    |
|                                                                    | O60                                                               | Preterm delivery                                                                                                                                                                | 1055 (5.8)                     |
|                                                                    | O99                                                               | Other maternal diseases classifiable elsewhere but complicating pregnancy, childbirth and puerperium                                                                            | 1,032 (5.7)                    |
|                                                                    | O42                                                               | Premature rupture of membranes                                                                                                                                                  | 964 (5.3)                      |
|                                                                    | O13                                                               | Gestational [pregnancy-induced] hypertension without significant proteinuria                                                                                                    | 908 (5.0)                      |
|                                                                    | O32                                                               | Maternal care for known or suspected malpresentation of fetus                                                                                                                   | 823 (4.5)                      |
|                                                                    | O70                                                               | Perineal laceration during delivery                                                                                                                                             | 658 (3.6)                      |
| O64                                                                | Obstructed labour due to malposition and malpresentation of fetus | 650 (3.6)                                                                                                                                                                       |                                |
| <i>Low Birth Weight, Other Perinatal and Congenital Conditions</i> | <b>ICD-10</b>                                                     | <b><i>Data is captured in CIHI-DAD. These codes reflect the Most Responsible Diagnosis</i></b>                                                                                  |                                |
|                                                                    | P07                                                               | Disorders related to short gestation and low birth weight, not elsewhere classified                                                                                             | 4,806 (44.9)                   |
|                                                                    | Z38                                                               | Liveborn infants according to place of birth                                                                                                                                    | 879 (8.2)                      |
|                                                                    | P22                                                               | Respiratory distress of newborn                                                                                                                                                 | 855 (8.0)                      |
|                                                                    | P96                                                               | Other conditions originating in the perinatal period                                                                                                                            | 219 (2.0)                      |
|                                                                    | Q21                                                               | Congenital malformations of cardiac septa                                                                                                                                       | 212 (2.0)                      |
|                                                                    | P28                                                               | Other respiratory conditions originating in the perinatal period                                                                                                                | 183 (1.7)                      |
|                                                                    | P59                                                               | Neonatal jaundice from other and unspecified causes                                                                                                                             | 146 (1.4)                      |
|                                                                    | P05                                                               | Slow fetal growth and fetal malnutrition                                                                                                                                        | 121 (1.1)                      |
|                                                                    | P24                                                               | Neonatal aspiration syndromes                                                                                                                                                   | 113 (1.1)                      |
| Q25                                                                | Congenital malformations of great arteries                        | 109 (1.0)                                                                                                                                                                       |                                |
| <i>Post-Admission Events</i>                                       | <b>ICD-10</b>                                                     | <b><i>Data is captured in CIHI-DAD. These codes reflect all cases with a Type 2 classification and/or any of the selected diagnosis codes of external causes of injury.</i></b> |                                |
|                                                                    | T81                                                               | Complications of procedures, not elsewhere classified                                                                                                                           | 8,459 (11.3)                   |
|                                                                    | T84                                                               | Complications of internal orthopaedic prosthetic devices, implants and grafts                                                                                                   | 3,692 (4.9)                    |
|                                                                    | N39*                                                              | Other disorders of urinary system                                                                                                                                               | 3,515 (4.7)                    |
|                                                                    | E87*                                                              | Other disorders of fluid, electrolyte and acid-base balance                                                                                                                     | 2,739 (3.6)                    |
|                                                                    | T82                                                               | Complications of cardiac and vascular prosthetic devices, implants and grafts                                                                                                   | 2,705 (3.6)                    |
|                                                                    | K91*                                                              | Post procedural disorders of digestive system, not elsewhere classified                                                                                                         | 2,364 (3.1)                    |
|                                                                    | I48*                                                              | Atrial fibrillation and flutter                                                                                                                                                 | 2,152 (2.9)                    |
|                                                                    | T85                                                               | Complications of other internal prosthetic devices, implants and grafts                                                                                                         | 1,562 (2.1)                    |
|                                                                    | J18*                                                              | Pneumonia, organism unspecified                                                                                                                                                 | 1,534 (2.0)                    |
| I95*                                                               | Hypotension                                                       | 1,468 (2.0)                                                                                                                                                                     |                                |

|                                                          |                          |                                                                                                                                                                                                                                                         |              |
|----------------------------------------------------------|--------------------------|---------------------------------------------------------------------------------------------------------------------------------------------------------------------------------------------------------------------------------------------------------|--------------|
| <p><i>Trauma, Accidents, Injuries and Poisonings</i></p> | <p><b>ICD-10</b></p>     | <p><b><i>Data is captured from two sources, CIHI-DAD and the National Ambulatory Reporting System (NACRS). These codes reflect any of the diagnosis codes related to trauma, accidents, poisoning, or injuries.</i></b></p>                             |              |
|                                                          | S72                      | Fracture of femur                                                                                                                                                                                                                                       | 10,210 (23)  |
|                                                          | S82                      | Fracture of lower leg, including ankle                                                                                                                                                                                                                  | 4,553 (10.3) |
|                                                          | S06                      | Intracranial injury                                                                                                                                                                                                                                     | 3,034 (6.8)  |
|                                                          | S32                      | Fracture of lumbar spine and pelvis                                                                                                                                                                                                                     | 3,009 (6.8)  |
|                                                          | S42                      | Fracture of shoulder and upper arm                                                                                                                                                                                                                      | 1,909 (4.3)  |
|                                                          | X61                      | Intentional self-poisoning by and exposure to antiepileptic, sedative-hypnotic, antiparkinsonism and psychotropic drugs, not elsewhere classified                                                                                                       | 1,569 (3.5)  |
|                                                          | S22                      | Fracture of rib(s), sternum and thoracic spine                                                                                                                                                                                                          | 1,547 (3.5)  |
|                                                          | S52                      | Fracture of forearm                                                                                                                                                                                                                                     | 1,306 (2.9)  |
|                                                          | S02                      | Fracture of skull and facial bones                                                                                                                                                                                                                      | 769 (1.7)    |
|                                                          | S09                      | Other and unspecified injuries of head                                                                                                                                                                                                                  | 716 (1.6)    |
| <p><i>Mental Illness and Addictions</i></p>              | <p><b>ICD 10-DAD</b></p> | <p><b><i>Data is captured from three sources, CIHI-DAD, NACRS, and the Ontario Mental Health Reporting System (OHMRS). Within the CIHI-DAD and NACRS, codes reflect the most responsible diagnosis. All admissions were included for OHMRS.</i></b></p> |              |
|                                                          | F05                      | Delirium, not induced by alcohol and other psychoactive substances                                                                                                                                                                                      | 1,581 (13.3) |
|                                                          | F32                      | Depressive episode                                                                                                                                                                                                                                      | 1,401 (11.8) |
|                                                          | F10                      | Mental and behavioural disorders due to use of alcohol                                                                                                                                                                                                  | 1,297 (10.9) |
|                                                          | F03                      | Unspecified dementia                                                                                                                                                                                                                                    | 1,208 (10.2) |
|                                                          | F43                      | Reaction to severe stress, and adjustment disorders                                                                                                                                                                                                     | 870 (7.3)    |
|                                                          | K70                      | Alcoholic liver disease                                                                                                                                                                                                                                 | 838 (7.1)    |
|                                                          | G30                      | Alzheimer's disease                                                                                                                                                                                                                                     | 569 (4.8)    |
|                                                          | F41                      | Other anxiety disorders                                                                                                                                                                                                                                 | 499 (4.2)    |
|                                                          | F50                      | Eating disorders                                                                                                                                                                                                                                        | 277 (2.3)    |
|                                                          | F29                      | Unspecified nonorganic psychosis                                                                                                                                                                                                                        | 245 (2.1)    |
|                                                          | <p><b>ICD9-OMHRS</b></p> |                                                                                                                                                                                                                                                         |              |
|                                                          | 296                      | Manic depressive psychosis, involuntal melancholia                                                                                                                                                                                                      | 9,997 (33.9) |
|                                                          | 295                      | Schizophrenia                                                                                                                                                                                                                                           | 7,859 (26.7) |
|                                                          | missing                  | Missing                                                                                                                                                                                                                                                 | 2,367 (8.0)  |
|                                                          | 298                      | Other psychoses                                                                                                                                                                                                                                         | 1,485 (5.0)  |
|                                                          | 300                      | Anxiety neurosis, hysteria, neurasthenia, obsessive compulsive neurosis, reactive depression                                                                                                                                                            | 1,106 (3.8)  |
|                                                          | 292                      | Drug psychosis                                                                                                                                                                                                                                          | 1,066 3.6    |
|                                                          | 294                      | Amnestic syndrome                                                                                                                                                                                                                                       | 797 2.7      |
|                                                          | 309                      | Adjustment reaction                                                                                                                                                                                                                                     | 741 2.5      |
|                                                          | 303                      | Alcoholism                                                                                                                                                                                                                                              | 733 2.5      |
|                                                          | 304                      | Drug dependence, drug addiction                                                                                                                                                                                                                         | 633 2.1      |

|                                                    |                                                                                    |                                                                                                                                                                                                                                                                                                                                                                                                                                                                                                                                                                                           |                                                                                                                                                                   |
|----------------------------------------------------|------------------------------------------------------------------------------------|-------------------------------------------------------------------------------------------------------------------------------------------------------------------------------------------------------------------------------------------------------------------------------------------------------------------------------------------------------------------------------------------------------------------------------------------------------------------------------------------------------------------------------------------------------------------------------------------|-------------------------------------------------------------------------------------------------------------------------------------------------------------------|
| <p><i>Ambulatory Care Sensitive Conditions</i></p> | <p>J44<br/>I50<br/>I20<br/>N39<br/>E11<br/>E10<br/>G40<br/>L03<br/>J45<br/>R56</p> | <p><b>Data is captured from CIHI-DAD. Codes reflect the most responsible diagnosis.</b></p> <p>Other chronic obstructive pulmonary disease<br/>Heart failure<br/>Angina pectoris<br/>Other disorders of urinary system<br/>Type 2 Diabetes mellitus<br/>Type 1 Diabetes mellitus<br/>Epilepsy<br/>Cellulitis<br/>Asthma<br/>Convulsions, not elsewhere classified</p>                                                                                                                                                                                                                     | <p>6,976 (25.9)<br/>3,779 (14)<br/>2,386 (8.9)<br/>1,925 (7.2)<br/>1,631 (6.1)<br/>1,228 (4.6)<br/>1,218 (4.5)<br/>1,150 (4.3)<br/>968 (3.6)<br/>948 (3.5)</p>    |
| <p><i>Cancer</i></p>                               | <p>C50<br/>C67<br/>C61<br/>C18<br/>C34<br/>C78<br/>C44<br/>C79<br/>C20<br/>C73</p> | <p><b>Data is captured from CIHI-DAD and Same Day Surgery (SDS). Codes reflect the most responsible diagnosis.</b></p> <p>Malignant neoplasm of breast<br/>Malignant neoplasm of bladder<br/>Malignant neoplasm of prostate<br/>Malignant neoplasm of colon<br/>Malignant neoplasm of bronchus and lung<br/>Secondary malignant neoplasm of respiratory and digestive organs<br/>Other malignant neoplasms of skin<br/>Secondary malignant neoplasm of other sites<br/>Malignant neoplasm of rectum<br/>Malignant neoplasm of thyroid gland</p>                                           | <p>7,806 (15.1)<br/>4,880 (9.4)<br/>4,278 (8.3)<br/>4,234 (8.2)<br/>4,123 (8)<br/>2,323 (4.5)<br/>2,056 (4)<br/>2,048 (4)<br/>1,889 (3.6)<br/>1,752 (3.4)</p>     |
| <p><i>Acute Planned Surgical</i></p>               | <p>M17<br/>H26<br/>I25<br/>D12<br/>M16<br/>Z08<br/>H25<br/>Z12<br/>N40<br/>Z09</p> | <p><b>Data is captured from CIHI-DAD and Same Day Surgery (SDS). Codes reflect the all planned surgeries, excluding cancer.</b></p> <p>Gonarthrosis [arthrosis of knee]<br/>Other cataract<br/>Chronic ischaemic heart disease<br/>Benign neoplasm of colon, rectum, anus and anal canal<br/>Coxarthrosis [arthrosis of hip]<br/>Follow-up examination after treatment for malignant neoplasm<br/>Senile cataract<br/>Special screening examination for neoplasms<br/>Hyperplasia of prostate<br/>Follow-up examination after treatment for conditions other than malignant neoplasms</p> | <p>17,137 (7.0)<br/>16,754 (6.8)<br/>10,816 (4.4)<br/>8,748 (3.6)<br/>8,585 (3.5)<br/>7,660 (3.1)<br/>5,741 (2.3)<br/>4,850 (2)<br/>4,799 (2)<br/>4,466 (1.8)</p> |
| <p><i>Acute Planned Medical</i></p>                | <p>Z53<br/>Z51<br/>I25<br/>Z54<br/>Z75</p>                                         | <p><b>Data is captured from CIHI-DAD. Codes reflect the major clinical category, excluding cancer.</b></p> <p>Persons encountering health services for specific procedures, not carried out<br/>Other medical care<br/>Chronic ischaemic heart disease<br/>Convalescence<br/>Problems related to medical facilities and other health care</p>                                                                                                                                                                                                                                             | <p>2,141 (27.5)<br/>1,197 (15.4)<br/>388 (5)<br/>220 (2.8)<br/>126 (1.6)</p>                                                                                      |

|                                 |                                                                    |                                                                                                                                                                                                                                                                                                                                              |                                                                                                                                                  |
|---------------------------------|--------------------------------------------------------------------|----------------------------------------------------------------------------------------------------------------------------------------------------------------------------------------------------------------------------------------------------------------------------------------------------------------------------------------------|--------------------------------------------------------------------------------------------------------------------------------------------------|
|                                 | J18<br>I21<br>E84<br>I48<br>Z50                                    | Pneumonia, organism unspecified<br>Acute myocardial infarction<br>Cystic fibrosis<br>Atrial fibrillation and flutter<br>Care involving use of rehabilitation procedures                                                                                                                                                                      | 96 (1.2)<br>94 (1.2)<br>88 (1.1)<br>87 (1.1)<br>85 (1.1)                                                                                         |
| <i>Acute Unplanned Surgical</i> |                                                                    | <b>Data is captured from CIHI-DAD. Codes reflect the major clinical category.</b>                                                                                                                                                                                                                                                            |                                                                                                                                                  |
|                                 | I21<br>K35<br>K80<br>K56<br>I25<br>I44<br>I20<br>N20<br>N13<br>K85 | Acute myocardial infarction<br>Acute appendicitis<br>Cholelithiasis<br>Paralytic ileus and intestinal obstruction without hernia<br>Chronic ischaemic heart disease<br>Atrioventricular and left bundle-branch block<br>Angina pectoris<br>Calculus of kidney and ureter<br>Obstructive and reflux uropathy<br>Acute pancreatitis            | 5,502 (19.3)<br>2,327 (8.1)<br>2,281 (8.0)<br>1,019 (3.6)<br>1,010 (3.5)<br>889 (3.1)<br>649 (2.3)<br>597 (2.1)<br>547 (1.9)<br>470 (1.6)        |
| <i>Acute Unplanned Medical</i>  |                                                                    | <b>Data is captured from CIHI-DAD. Codes reflect the major clinical category.</b>                                                                                                                                                                                                                                                            |                                                                                                                                                  |
|                                 | I21<br>J18<br>I50<br>J44<br>I63<br>Z51<br>R07<br>I48<br>K56<br>N39 | Acute myocardial infarction<br>Pneumonia, organism unspecified<br>Heart failure<br>Other chronic obstructive pulmonary disease<br>Cerebral infarction<br>Other medical care<br>Pain in throat and chest<br>Atrial fibrillation and flutter<br>Paralytic ileus and intestinal obstruction without hernia<br>Other disorders of urinary system | 8,741 (6)<br>7,816 (5.4)<br>6,867 (4.7)<br>6,825 (4.7)<br>5,200 (3.6)<br>5,140 (3.5)<br>4,323 (3.0)<br>4,094 (2.8)<br>3,347 (2.3)<br>2,951 (2.0) |
